# Supplementary material for: Copper(ii) ion selective and strong acid-tolerable hydrogels formed by an l-histidine ester terminated bolaamphiphile: from single molecular thick nanofibers to single-wall nanotubes
Source: Royal Society of Chemistry journal article supplement (doi:10.1039/c3cc41786g), 2013-01-01
Supplement: c3cc41786g.pdf [file c3cc41786g.pdf]

## Supporting information for

# Copper (II) ion selective and strong acid-tolerable hydrogel by an L-histidine ester terminated bolaamphiphile: from single molecular thick nanofiber to single-wall nanotube

Yaqing Liu,<sup>a</sup> Tianyu Wang,<sup>\*a</sup> Zhibo Li,<sup>b</sup> and Minghua Liu<sup>\*a</sup>

<sup>a</sup> Beijing National Laboratory for Molecular Science (BNLMS), CAS Key Laboratory of Colloid, Interface and Chemical Thermodynamics, Institute of Chemistry, Chinese Academy of Sciences, Beijing, 100190, People's Republic of China. Tel: 86-10-82612655;

E-mail: [liumh@iccas.ac.cn](mailto:liumh@iccas.ac.cn) (M. Liu); [twang@iccas.ac.cn](mailto:twang@iccas.ac.cn) (T. Wang)

<sup>b</sup> State Key Laboratory of Polymer Physics and Chemistry, Joint Laboratory of Polymer Science and Material, Institute of Chemistry, Chinese Academy of Sciences, Beijing 100190, People's Republic of China.

### Experimental Section

**Instruments and methods:** <sup>1</sup>H NMR spectra were recorded on a Bruker AV400 (400 MHz) spectrometer. Mass spectral data were obtained by using a BIFLEIII matrix-assisted laser desorption/ionization time-of flight mass spectrometry (MALDI-TOF MS) instrument. Elemental analysis was performed on a Carlo-Erba-1106 Thermo-Quest.

Fourier transform infrared (FT-IR) spectra were recorded on a JASCO FT/IR-660 plus spectrophotometer with a wavenumber resolution of 4 cm<sup>-1</sup> at room temperature. X-ray diffraction (XRD) was achieved on a Rigaku D/Max-2500 X-ray diffractometer (Japan) with Cu/K $\alpha$  radiation ( $\lambda=1.5406\text{\AA}$ ), which was operated at 45 kV, 100 mA. Scanning electron microscopy (SEM) was performed on a Hitachi S-4800 FE-SEM microscope and transmission electron microscopy (TEM) images were obtained on a JEM-1011 electron microscope operating at accelerating voltages of 10 and 200 kV, respectively.

Cryo-TEM was performed on a JEOL JEM-2200FS TEM operating at 200 kV equipped with a Gatan cryoholder.

**Synthesis:** All starting materials and solvents were purchased from Aldrich, Acros Organics or Beijing Chemicals and used as received unless otherwise stated. Milli-Q water (18.2M $\Omega$ cm) was used in all cases. The bolaamphiphile, N,N-icosanedioyl-di-L-histidine methyl esters (**BolaHis**) was synthesized by the amidation of L-histidine methyl ester with eicosanedioic acid. Yield=61%. <sup>1</sup>H NMR (400MHz, [D<sub>6</sub>]-DMSO, 25°C, TMS): 1.23(s, 30H; CH<sub>2</sub>), 1.41-1.44(m, 4H; CH<sub>2</sub>), 2.04-2.08(t, <sup>3</sup>J(H,H)=7.2 Hz, 4H), 2.79-2.92(m, 4H; CH<sub>2</sub>), 3.58(s, 6H; CH<sub>3</sub>), 4.43-4.48(q, <sup>3</sup>J(H,H)=7 Hz, 2H; CH), 6.77(s, 2H; NH), 7.51(s, 2H; imi-C(4)H), 8.14 (s, 2H; imi-C(2)H), 11.80(s, 2H; imi-NH). MALDI-TOF-MS: m/z (%): 645.7 [M+H]<sup>+</sup>, 667.7 [M+Na]<sup>+</sup>, 683.7 [M+K]<sup>+</sup>. Elemental Analysis calcd(%) for C<sub>34</sub>H<sub>56</sub>N<sub>6</sub>O<sub>6</sub>: C 63.33, H 8.75, N 13.03; found: C 63.18, H 8.84, N 12.69.

**Procedures:** For the TEM and SEM measurements, a small amount of hydrogels were placed onto carbon coated copper grid (unstained) or single-crystal silicon plate (Pt coated) respectively after vacuum-dried for 12 hours. In the case of preparing samples for XRD measurements, gels were cast onto glass plates and dried in vacuum. Platelets made from the mixture of vacuum-dried xerogels with KBr powder and hydrogel sample nipped by CaF<sub>2</sub> platelets were used for FT-IR spectral measurements.

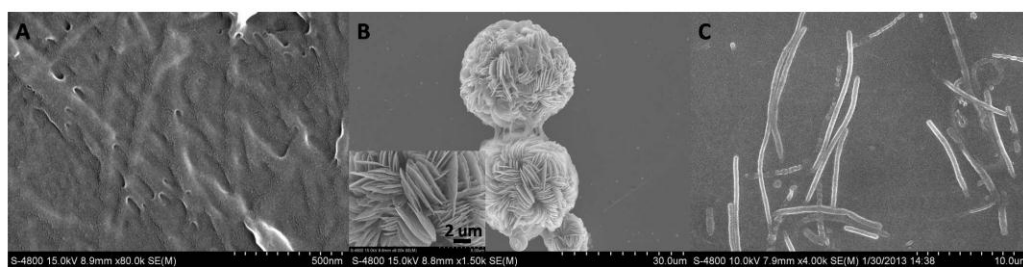

Figure S1: SEM images of self-assembled nanostructures (precipitates) formed by **BolaHis** with  $\text{CoCl}_2$  (A),  $\text{NiCl}_2$  (B), and  $\text{ZnCl}_2$  (C).

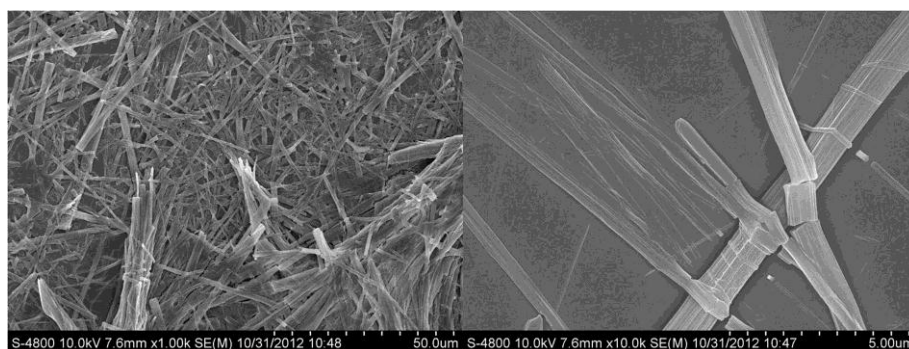

Figure S2: SEM images of hydrogel formed by **BolaHis** in 6M HCl solution.

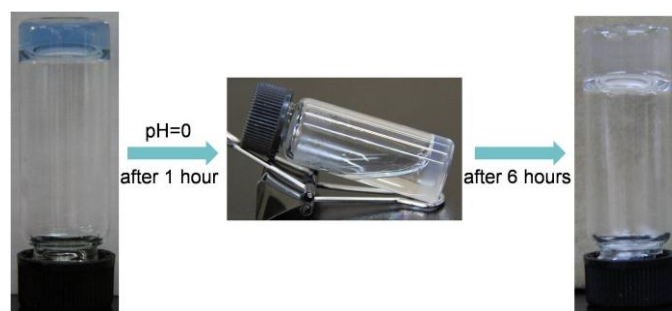

Figure S3: The photographs of transition process from **BolaHis**/ $\text{Cu}^{2+}$  hydrogel to **BolaHis**/ $\text{H}^+$  hydrogel.
